# Supplementary material
Source: publisher figshare collection journal article supplement (https://acs.figshare.com/ndownloader/files/5102962)
Supplement: Supplementary file 1 [file 5102962]

HEADER    PROTEIN
COMPND    au2h2o.pdb 
AUTHOR    GENERATED BY BABEL 1.6 
ATOM      1 AU   UNK     1      -0.035   0.100  -0.079  1.00  0.00 
ATOM      2  O   UNK     1      -0.027   1.443   1.514  1.00  0.00 
ATOM      3  O   UNK     1      -0.080  -1.148  -1.747  1.00  0.00 
ATOM      4  H   UNK     1      -0.917   1.614   1.885  1.00  0.00 
ATOM      5  H   UNK     1       0.551   1.179   2.259  1.00  0.00 
ATOM      6  H   UNK     1       0.730  -1.094  -2.296  1.00  0.00 
ATOM      7  H   UNK     1      -0.221  -2.093  -1.536  1.00  0.00 
CONECT    1    2    3
CONECT    2    1    4    5
CONECT    3    1    6    7
CONECT    4    2
CONECT    5    2
CONECT    6    3
CONECT    7    3
MASTER        0    0    0    0    0    0    0    0    7    0    7    0
END
